# Supplementary material for: Mussel-inspired zwitterionic copolyethers for antifouling biomedical surfaces
Source: Royal Society of Chemistry journal article supplement (doi:10.1039/d3py01286g), 2024-01-01
Supplement: d3py01286g1.pdf [file d3py01286g1.pdf]

Electronic Supplementary Material (ESI) for Polymer Chemistry.  
This journal is © The Royal Society of Chemistry 2023

## **Mussel-Inspired Zwitterionic Copolyethers for Antifouling Biomedical Surfaces**

*Minjung Kim,<sup>a†</sup> Minseong Kim,<sup>a†</sup> Woojin Choi,<sup>b</sup> Milae Lee,<sup>b</sup> Jieun Kim,<sup>c</sup> Yeiji Kim,<sup>c</sup> Kyung  
Hyun Kim,<sup>d</sup> Ji Yeoun Lee,<sup>c,d</sup> Jinkee Hong,<sup>b</sup> and Byeong-Su Kim<sup>a\*</sup>*

<sup>a</sup>Department of Chemistry, Yonsei University, Seoul 03722, Republic of Korea

<sup>b</sup>Department of Chemical and Biomolecular Engineering, College of Engineering, Yonsei  
University, Seoul 03722, Republic of Korea

<sup>c</sup>Department of Anatomy and Cell Biology, Seoul National University College of Medicine,  
Seoul 03080, Republic of Korea

<sup>d</sup>Department of Neurosurgery, Seoul National University Hospital, Seoul National University  
College of Medicine, Seoul 03080, Republic of Korea

E-mail: bskim19@yonsei.ac.kr

<sup>†</sup>These authors contributed equally to this work.

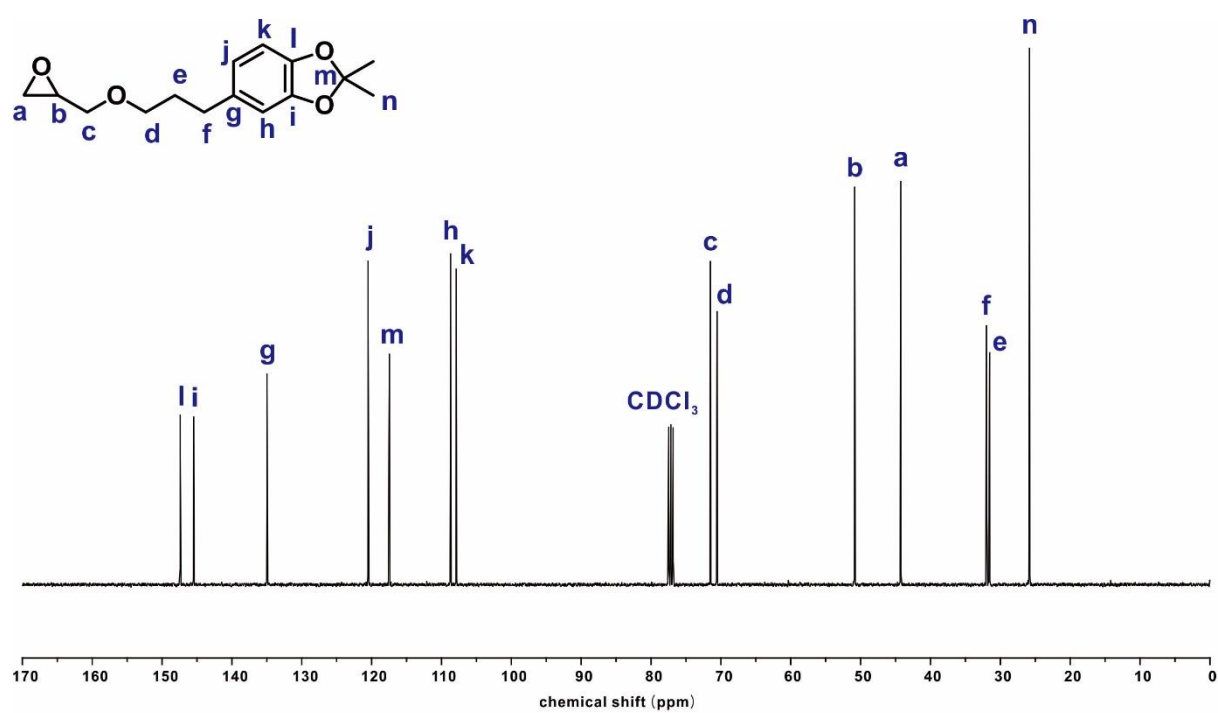

**Fig. S1**  $^{13}\text{C}$  NMR spectrum of CAGE (101 MHz,  $\text{CDCl}_3$ ).

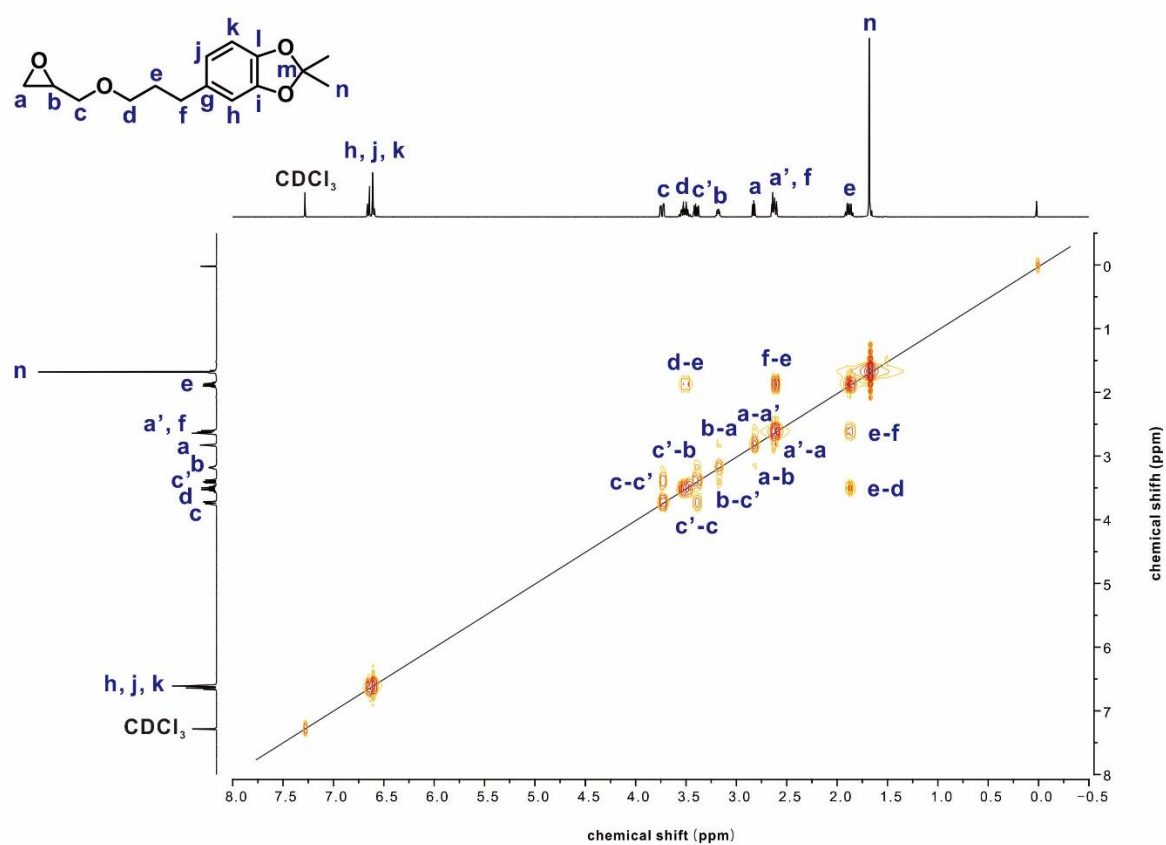

**Fig. S2** COSY NMR spectrum of CAGE (400 MHz, CDCl<sub>3</sub>).

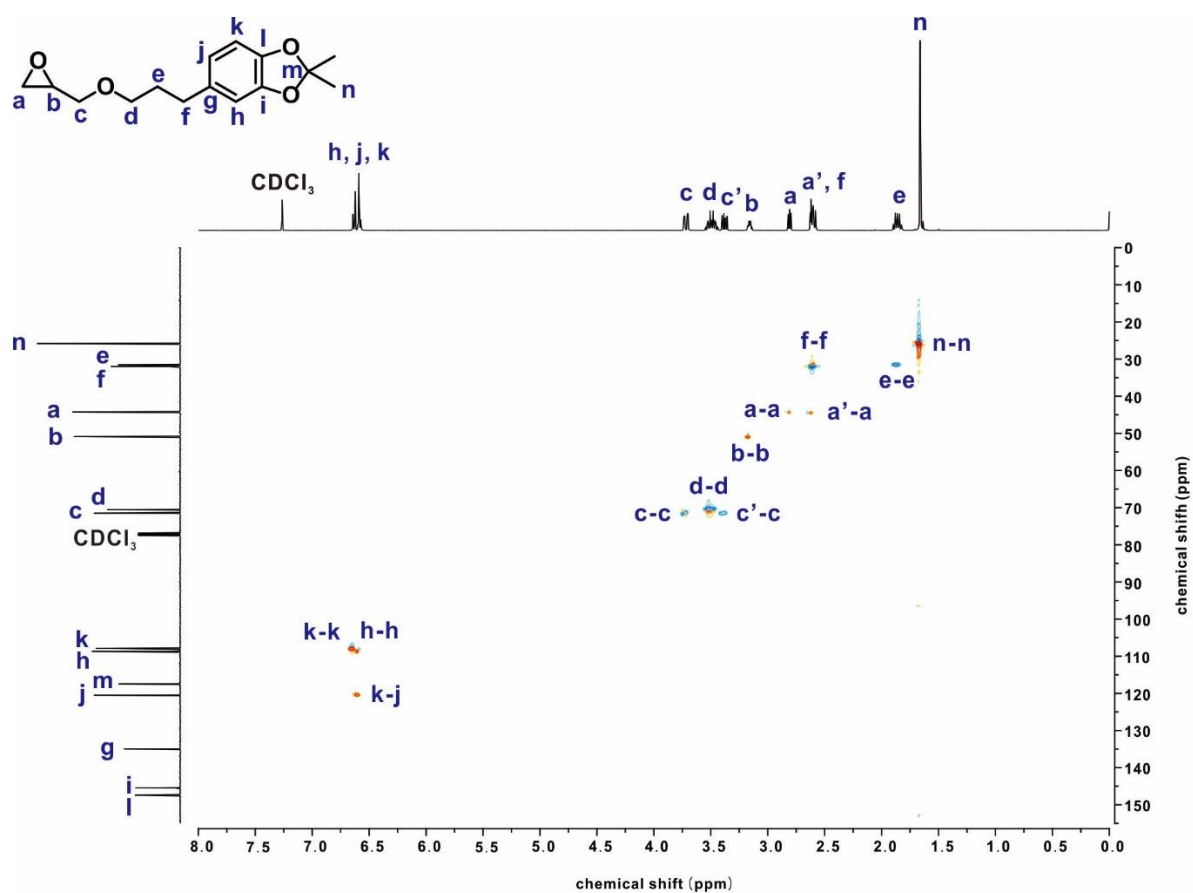

**Fig. S3** HSQC NMR spectrum of CAGE measured in  $\text{CDCl}_3$ .

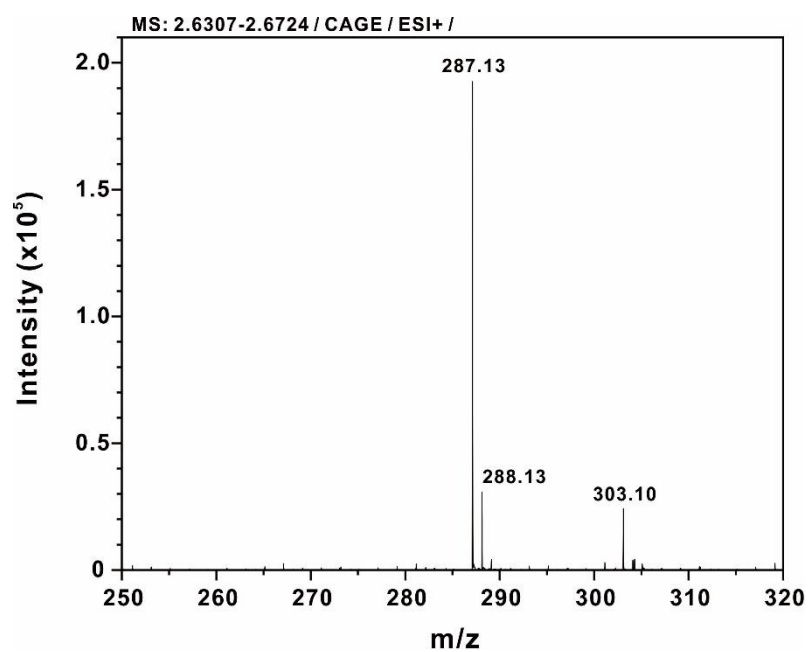

**Fig. S4** ESI-MS spectrum of CAGE ( $m/z$ ):  $C_{15}H_{20}O_4Na$  ( $[M + Na]^+$ ), calcd. 287.31, found. 287.13.

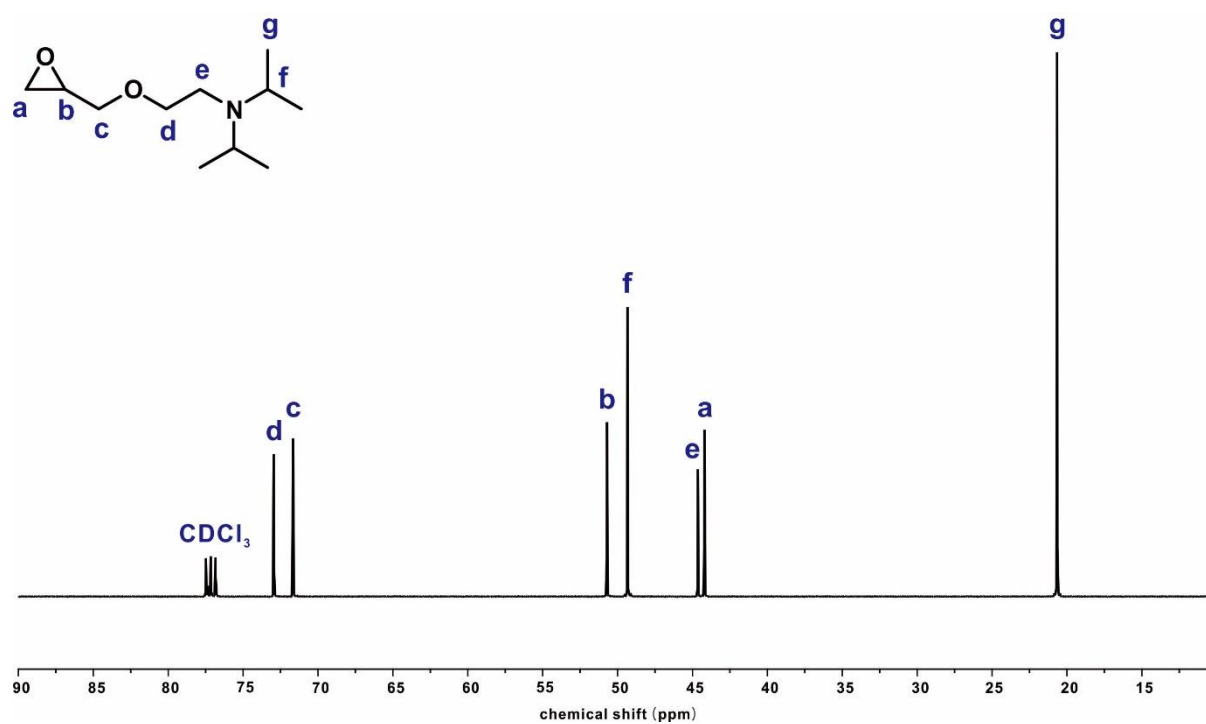

**Fig. S5** <sup>13</sup>C NMR spectrum of DEGE (101 MHz, CDCl<sub>3</sub>).

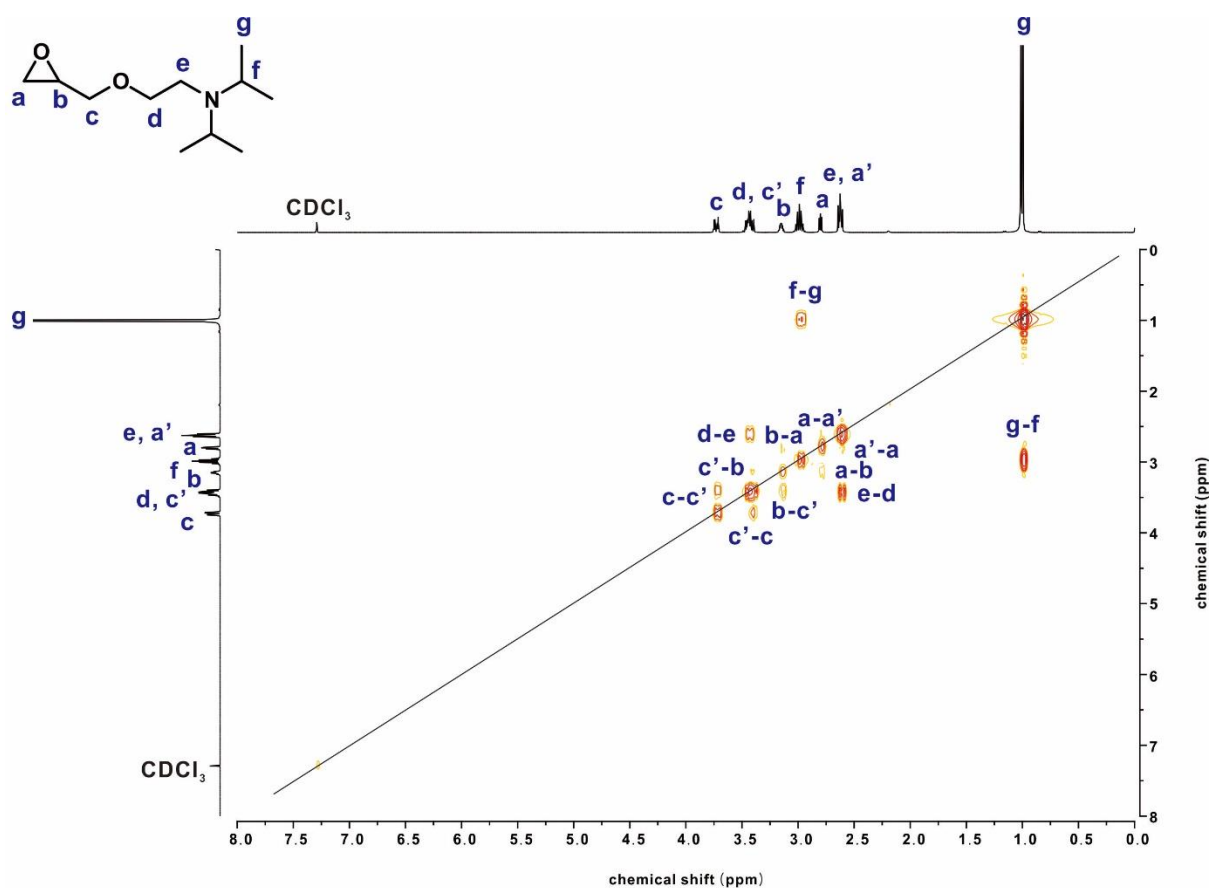

**Fig. S6** COSY NMR spectrum of DEGE (400 MHz,  $\text{CDCl}_3$ ).

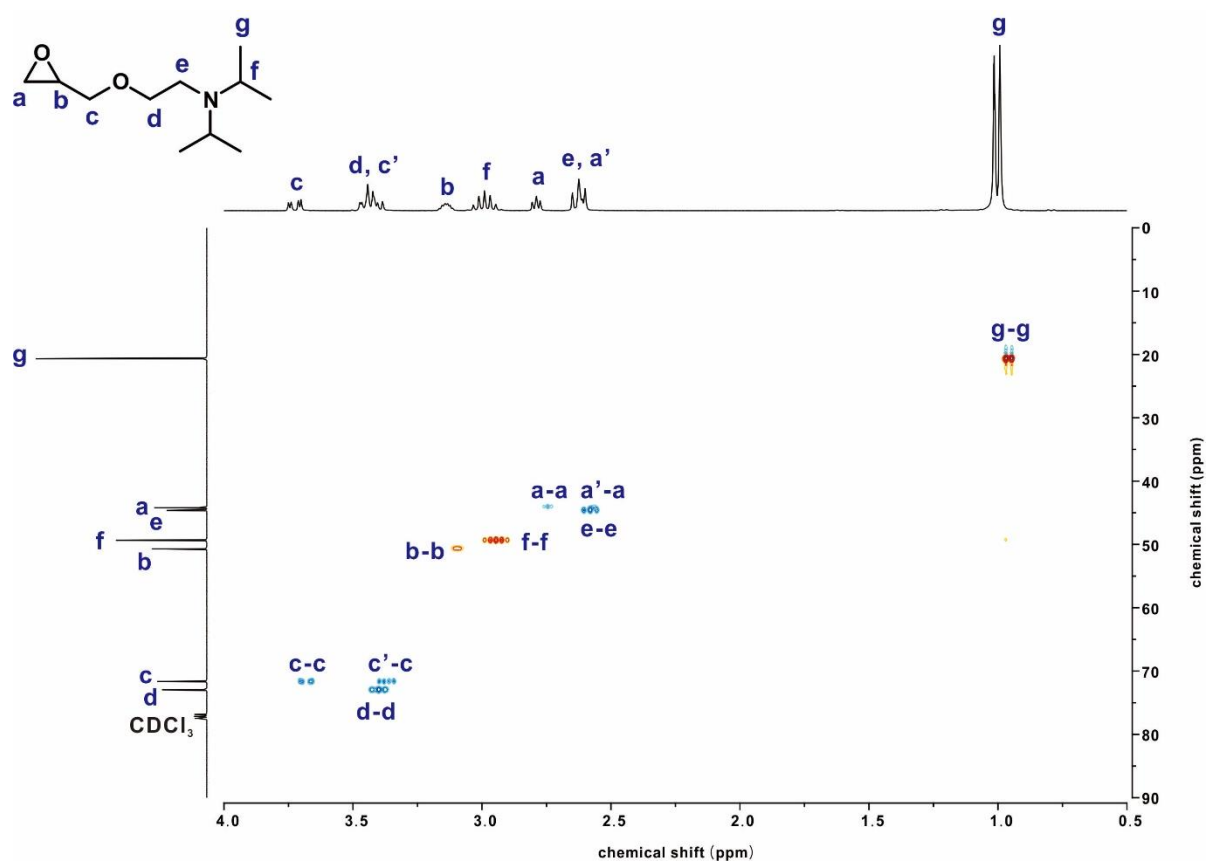

**Fig. S7** HSQC NMR spectrum of DEGE in  $\text{CDCl}_3$ .



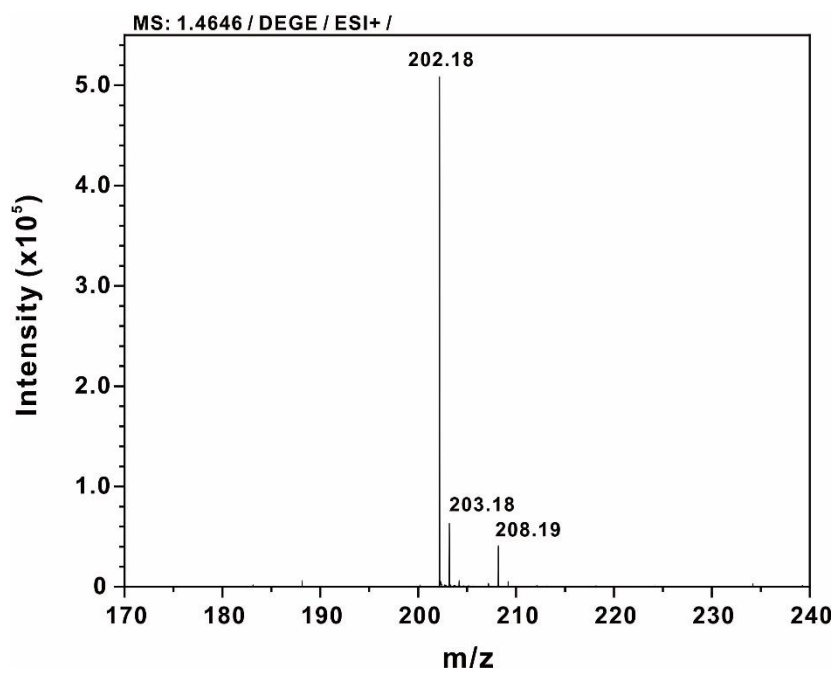

**Fig. S8** ESI-MS spectrum of DEGE ( $m/z$ ):  $C_{11}H_{23}NO_2H$  ( $[M + H]^+$ ), calcd. 202.32, found. 202.18.

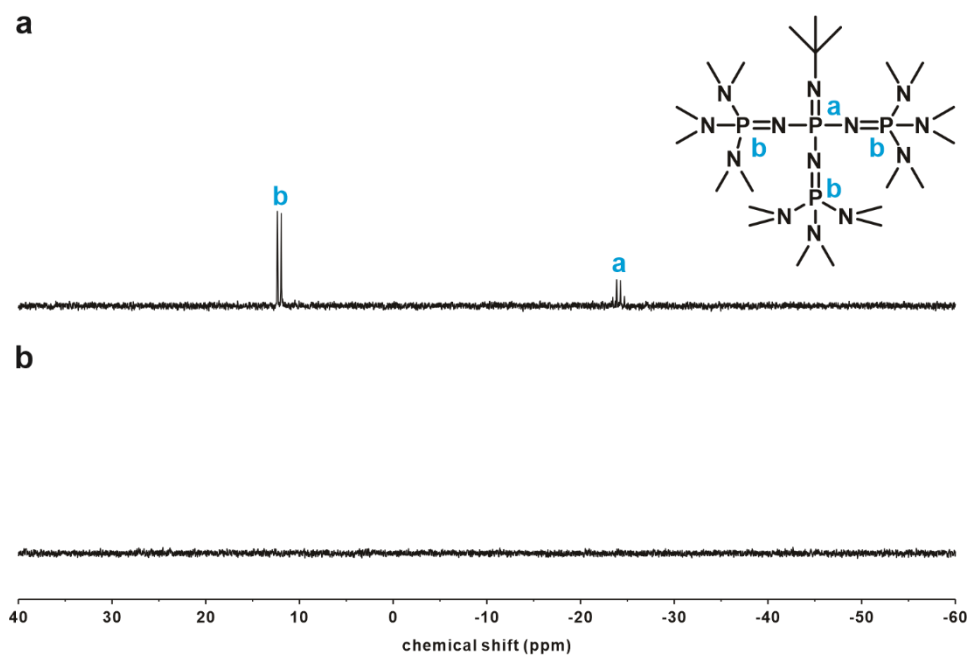

**Fig. S9**  $^{31}\text{P}$  NMR spectrum of (a) polymer mixture with  $t\text{-BuP}_4$  and (b) polymer sample after purification steps (122 MHz,  $\text{CDCl}_3$ ).

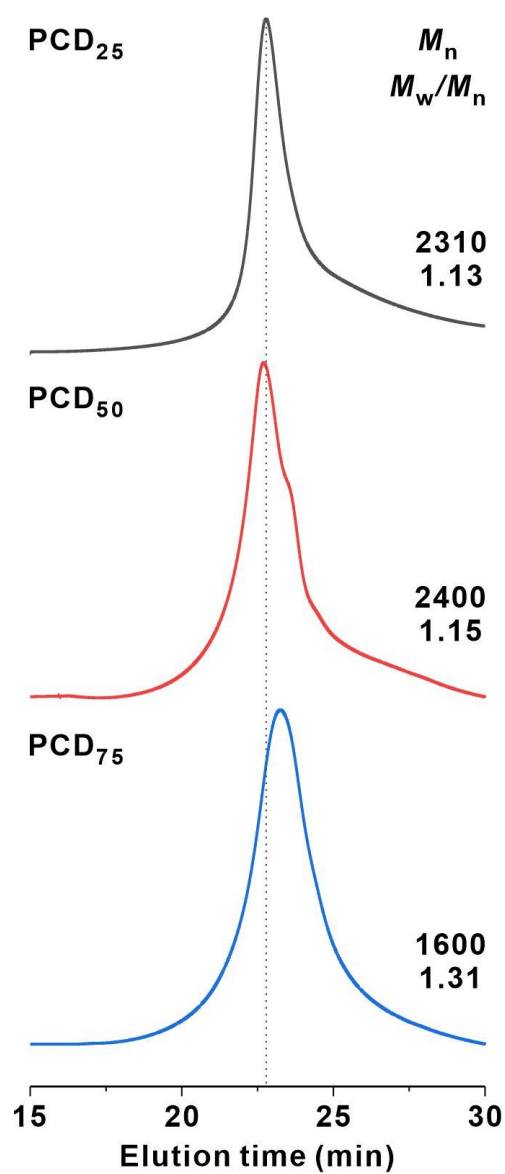

**Fig. S10** GPC elution traces of P(CAGE-*b*-DEGE) block copolymers (PCD<sub>25</sub>, PCD<sub>50</sub>, and PCD<sub>75</sub> in Table 1).

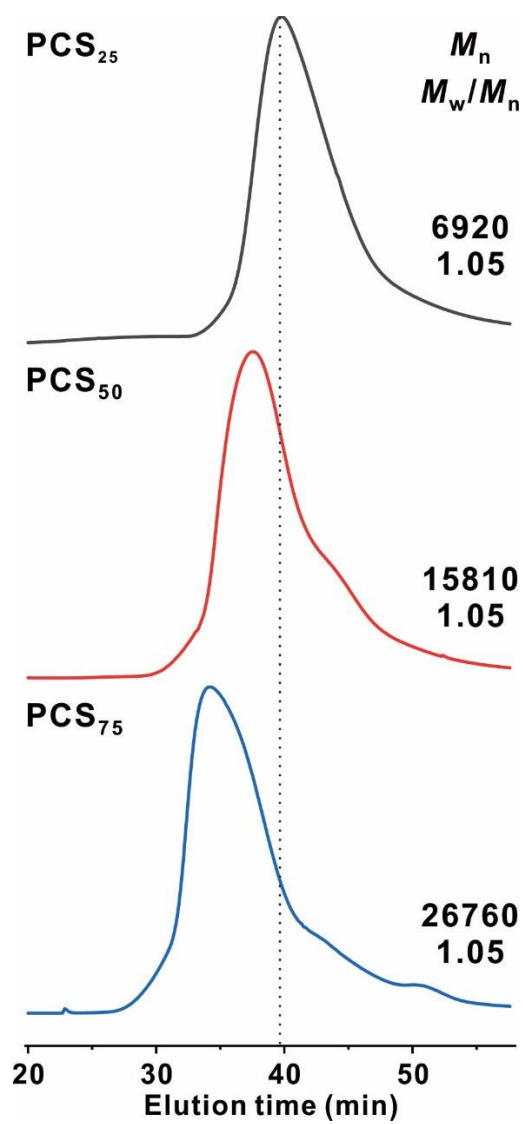

**Fig. S11** GPC elution traces of P(CGE-*b*-SB) block copolymers (PCS<sub>25</sub>, PCS<sub>50</sub>, and PCS<sub>75</sub> in Table 1).

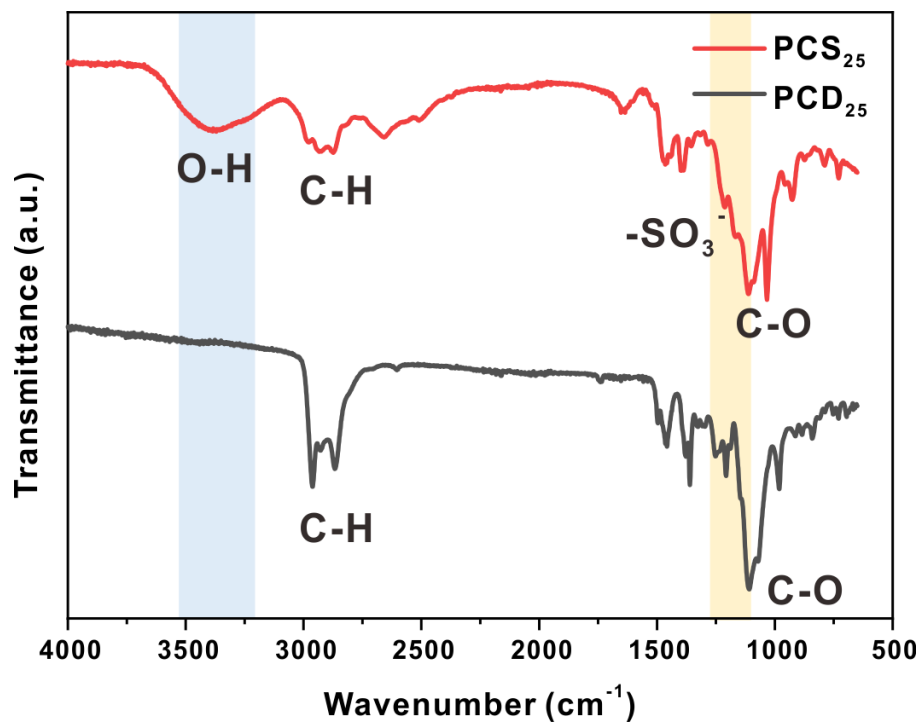

**Fig. S12** FT-IR spectra of (black)  $\text{P}(\text{CAGE}_5\text{-}b\text{-DEGE}_{20})$  and (red)  $\text{P}(\text{CGE}_5\text{-}b\text{-SB}_{20})$  block copolymers ( $\text{PCD}_{25}$  and  $\text{PCS}_{25}$  in Table 1).

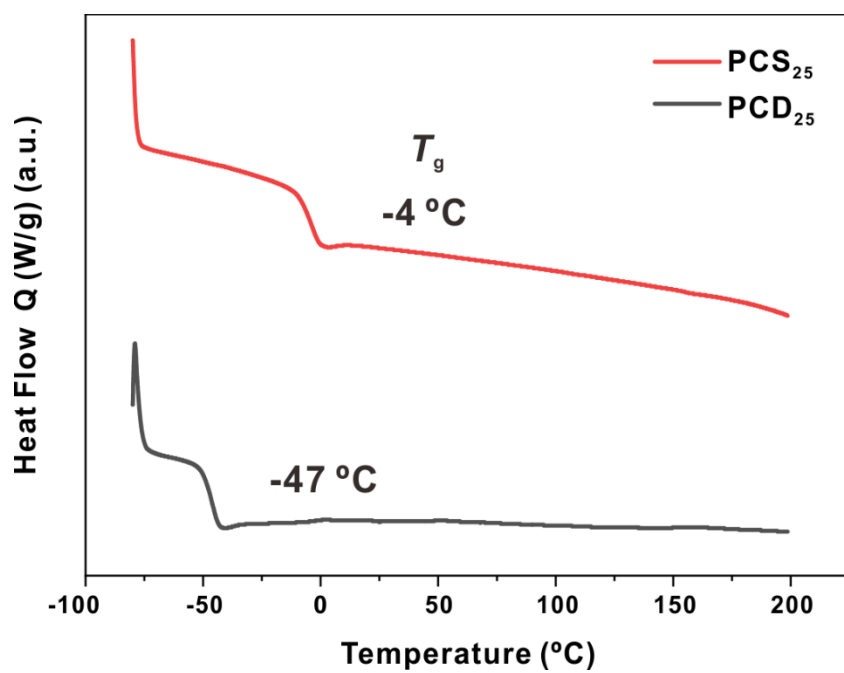

**Fig. S13** DSC thermograms of (black) P(CAGE<sub>5</sub>-*b*-DEGE<sub>20</sub>) and (red) P(CGE<sub>5</sub>-*b*-SB<sub>20</sub>) block copolymers (PCD<sub>25</sub> and PCS<sub>25</sub> in Table 1).

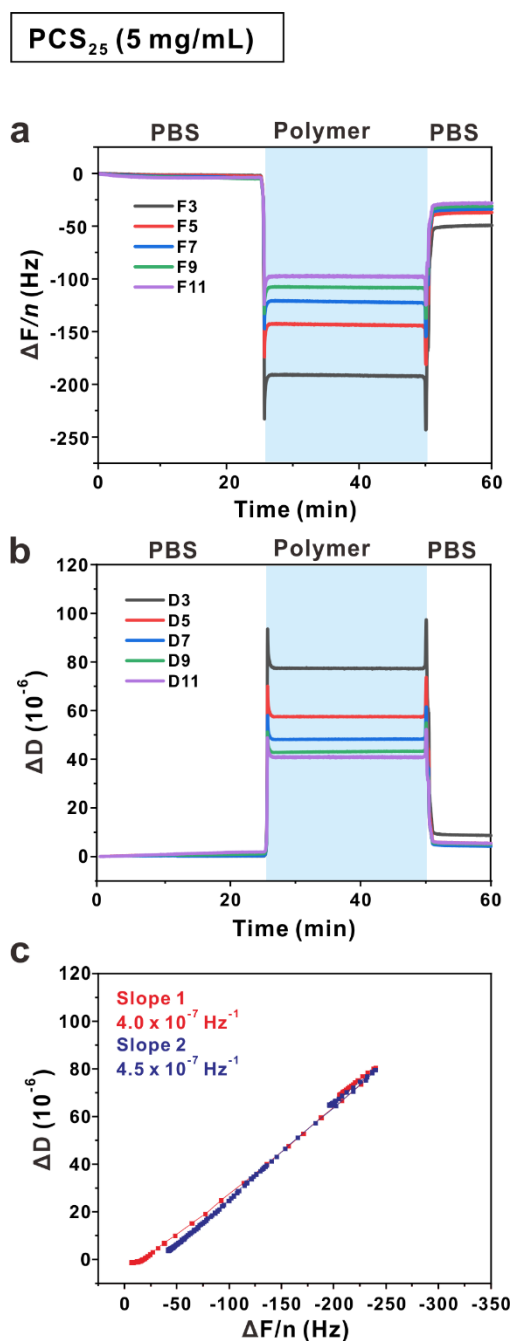

**Fig. S14** (a) Frequency shift, (b) dissipation shift, and (c)  $\Delta D/(\Delta F/n)$  plot of the adsorption of the PCS<sub>25</sub> on QCM-D gold substrate. The sections where the polymer was coated and washed are the red section and the blue section, respectively. Slope 1 and slope 2 means the slope of the coating section and washing section, respectively.

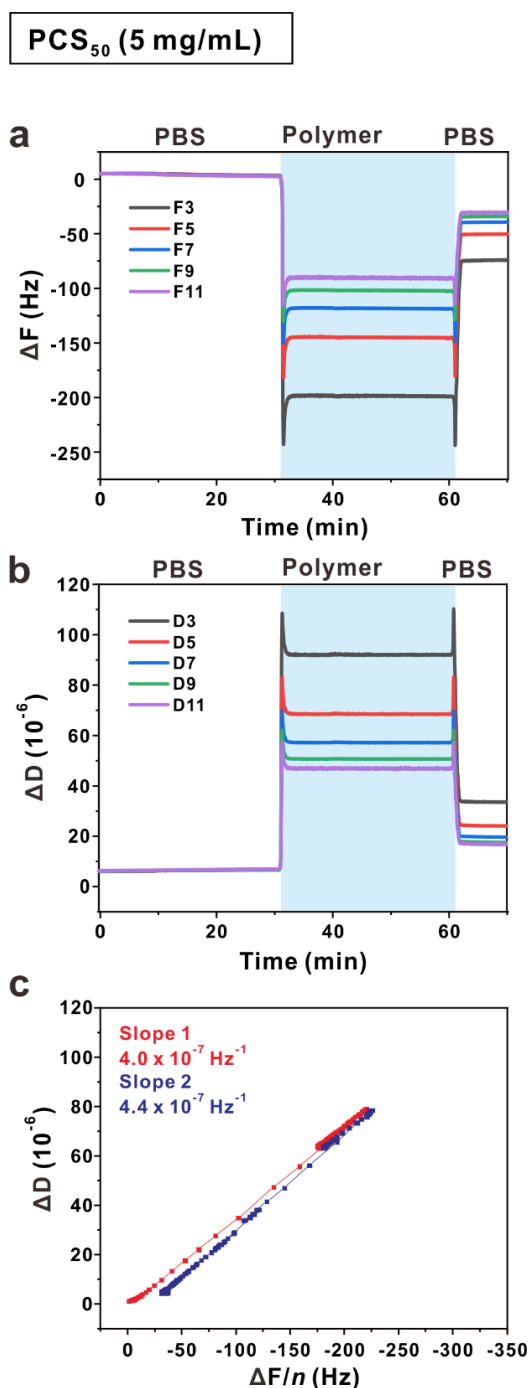

**Fig. S15** (a) Frequency shift, (b) dissipation shift, and (c)  $\Delta D/(\Delta F/n)$  plot of the adsorption of the PCS<sub>50</sub> on QCM-D gold substrate. The sections where the polymer was coated and washed are the red section and the blue section, respectively. Slope 1 and slope 2 means the slope of the coating section and washing section, respectively.



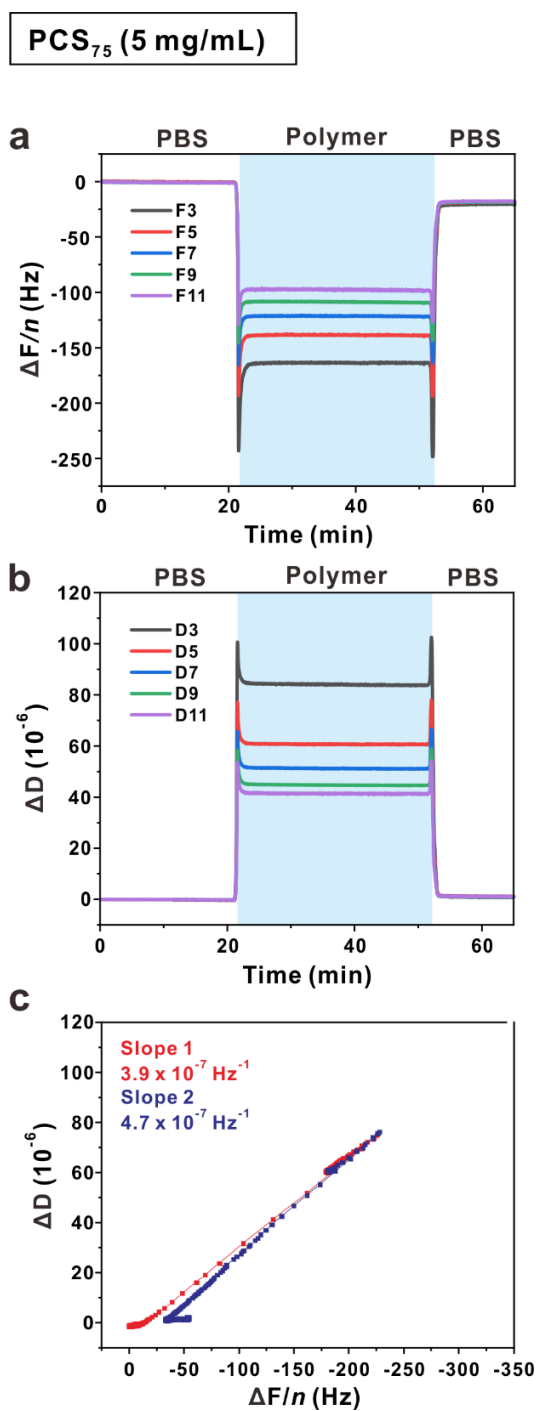

**Fig. S16** (a) Frequency shift, (b) dissipation shift, and (c)  $\Delta D/(\Delta F/n)$  plot of the adsorption of the PCS<sub>75</sub> on QCM-D gold substrate. The sections where the polymer was coated and washed are the red section and the blue section, respectively. Slope 1 and slope 2 means the slope of the coating section and washing section, respectively.
